# Supplementary material for: Differences in Ratio of Carbon Stable Isotopes among Barley Grain Milling Fractions with Various Concentrations of Beta-Glucans
Source: MDPI journal article supplement (doi:10.3390/molecules28155738), 2023-07-29
Supplement: s1 [file s1]

Table S1. Stable carbon isotope ratio with mean, standard deviation, median and minimum and maximum values (all values are displayed in per mill notation ‰).

| <b>Cultivar</b> | <b>Milling<br/>fraction</b> | <b>mean</b> | <b>sd</b> | <b>median</b> | <b>min</b> | <b>max</b> |
|-----------------|-----------------------------|-------------|-----------|---------------|------------|------------|
| Sandra          | A0                          | -28.00      | ±0.07     | -28.01        | -28.07     | -27.93     |
|                 | A1                          | -27.95      | ±0.08     | -27.93        | -28.04     | -27.89     |
|                 | A2                          | -28.78      | ±0.08     | -28.74        | -28.88     | -28.73     |
| Hyvido          | B0                          | -28.22      | ±0.11     | -28.27        | -28.30     | -28.09     |
|                 | B1                          | -28.08      | ±0.02     | -28.08        | -28.10     | -28.07     |
|                 | B2                          | -28.51      | ±0.21     | -28.58        | -28.67     | -28.27     |
| AF<br>Cesar     | C0                          | -27.59      | ±0.18     | -27.65        | -27.74     | -27.39     |
|                 | C1                          | -27.36      | ±0.07     | -27.33        | -27.44     | -27.32     |
|                 | C2                          | -28.04      | ±0.07     | -28.05        | -28.10     | -27.96     |
|                 | C3                          | -26.97      | ±0.11     | -27.02        | -27.05     | -26.84     |
